# Supplementary material for: De novo sequencing of the Hypericum perforatum L. flower transcriptome to identify potential genes that are related to plant reproduction sensu lato
Source: PubMed Central journal article supplement (PMC4451943; doi:10.1186/s12864-015-1439-y), 2015-03-31

## T1 - Exp1

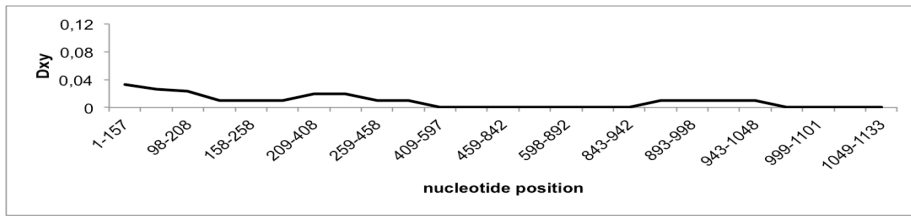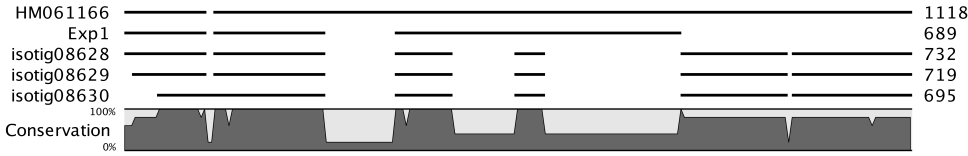

## T2 - WRKY

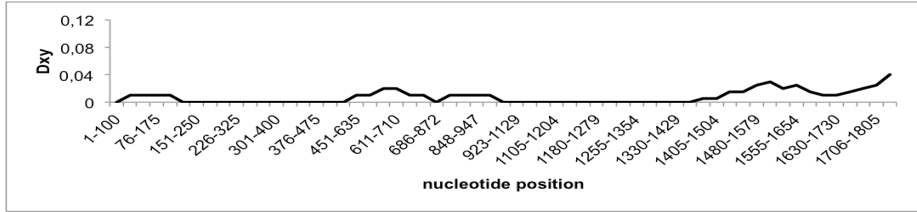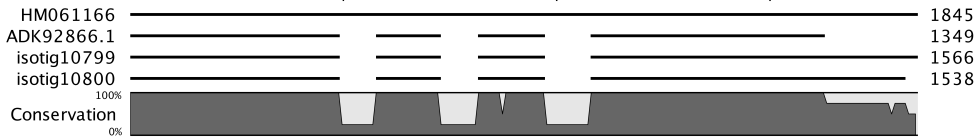

## T3 - DGCR

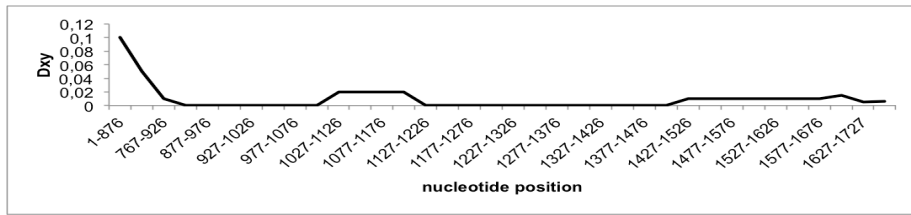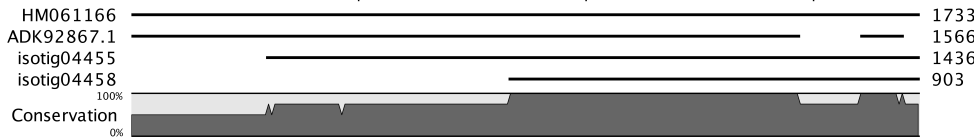

## T4 - ARI7

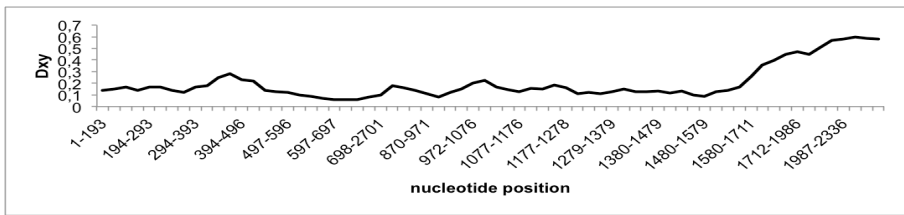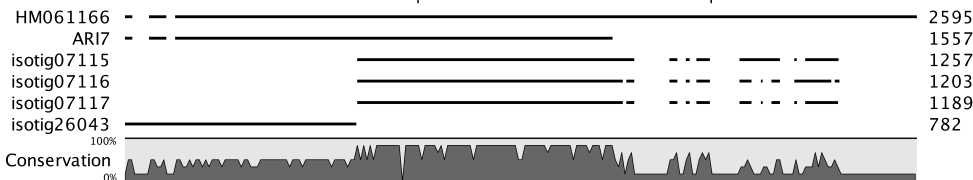

## T5 - TK

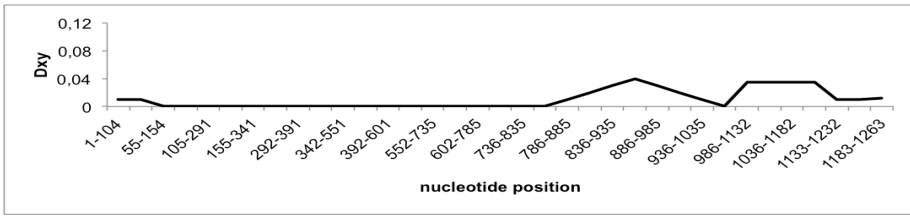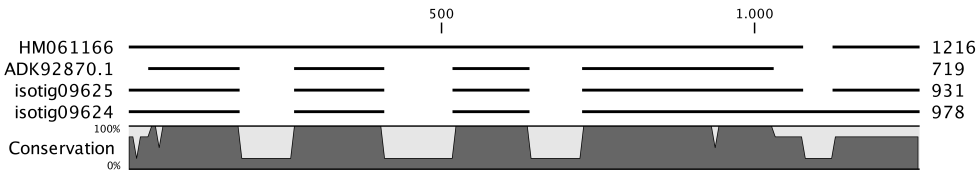

## T6 - HnRNP

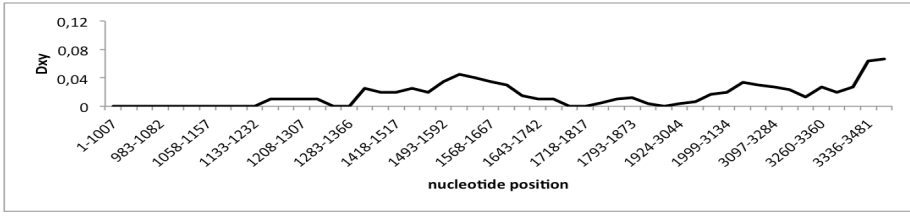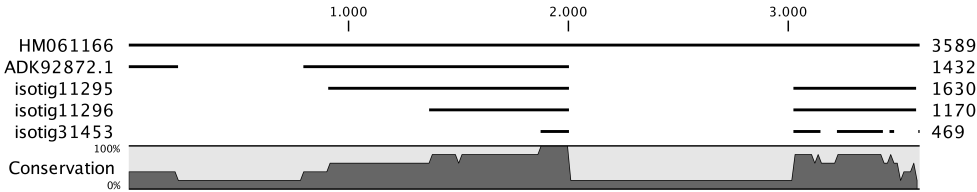

## T7 - RimL

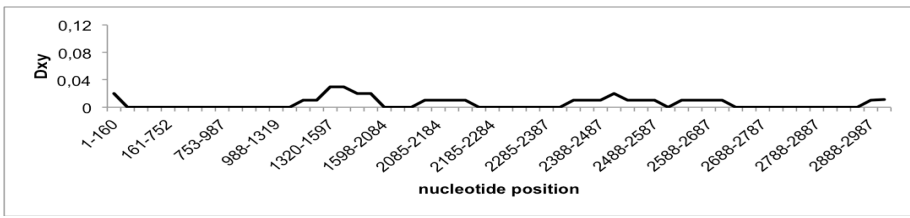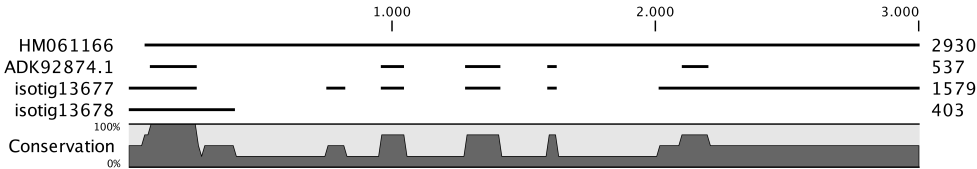

## T8 - Mo25

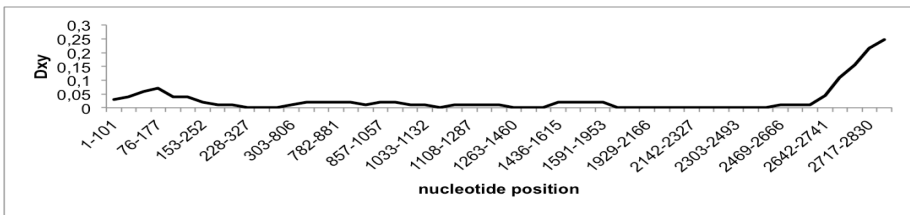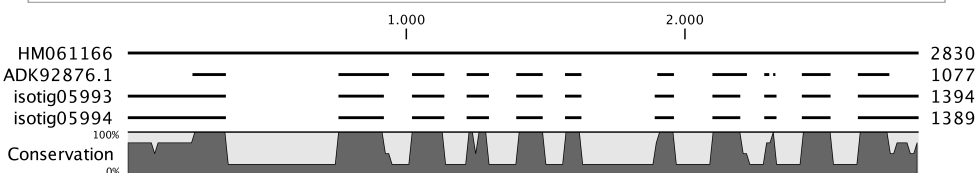

# T9 - PG

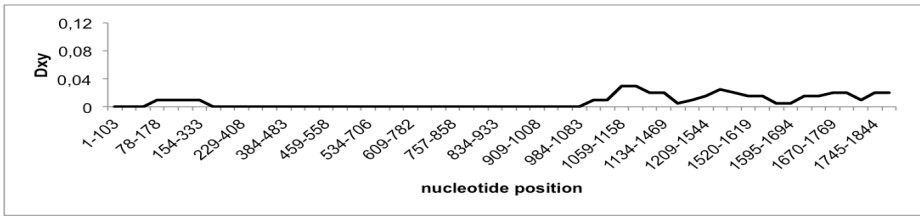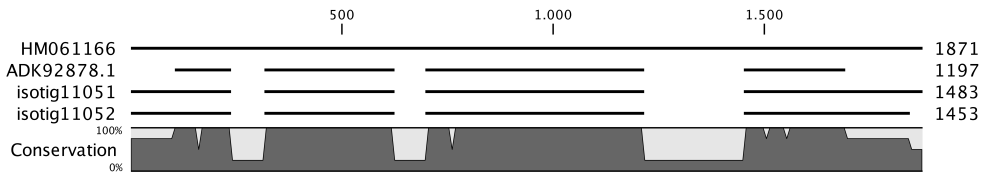

Supplement: 12864_2015_1439_MOESM2_ESM.pdf [file 12864_2015_1439_MOESM2_ESM.pdf]
